# Supplementary material for: A deep learning approach to predict blood-brain barrier permeability
Source: PeerJ journal article supplement (doi:10.7717/peerj-cs.515), 2021-06-10
Supplement: Supporting_info.pdf [file Supporting_info.pdf]

# 1 DEEP LEARNING OVERVIEW SUPPORTING INFORMATION

## 1.1 Activation Functions

### 1. Sigmoid:

$$F(X) = \frac{1}{1 + e^{(-\sum_j w_j x_j - b)}} \quad (1)$$

Simplified to:

$$f(X) = \frac{1}{1 + e^{-x}} \quad (2)$$

The shape of sigmoid function is shown in 1(b).

5

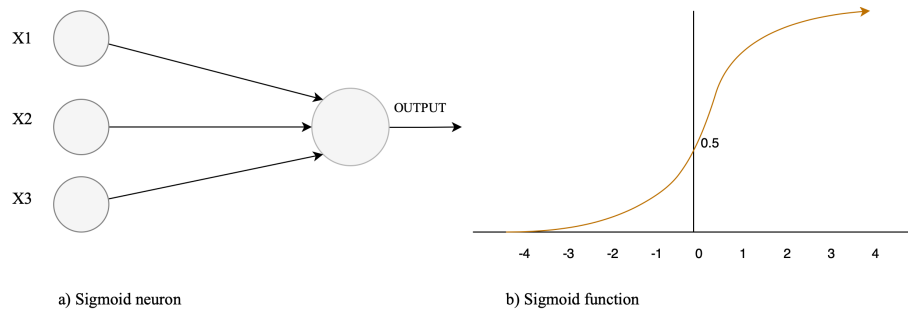

Figure S1: Sigmoid function

### 2. ReLU and Leaky ReLU:

6

$$ReLU(x) = \begin{cases} 0 & \text{if } x < 0 \\ x & \text{if } x > 0 \end{cases} \quad (3)$$

This equation can be written as:

$$f(x) = \max(0, x) \quad (4)$$

Leaky ReLU is defined as:

7

$$f(x) = \max(0.01, x) \quad (5)$$

### 3. Tanh: hyperbolic tangent:

8

$$f(x) = \tanh(x) = \frac{2}{1 + e^{-2x}} - 1 \quad (6)$$

## 1.2 MinMax scaler equation

MinMax scaler can be calculated as shown in the following equation:

$$X_{norm} = \frac{X - X_{min}}{X_{max} - X_{min}} \quad (7)$$

Table S1: Final number of attributes (descriptors)

| Descriptor type | Number of descriptors | Tool           | Final Count      |
|-----------------|-----------------------|----------------|------------------|
| 1D and 2D       | 3874                  | Alvadesc (noa) | 6394 descriptors |
| 3D              | 306                   | Ochem (3)      |                  |
| MACCS           | 166                   | Alvadesc (noa) |                  |
| Hashed (ECFP)   | 1024                  | Alvadesc (noa) |                  |
| Hashed (Path)   | 1024                  | Alvadesc (noa) |                  |

### 1.3 Outliers

Eight compounds descriptors failed to be calculated. Those records had null values for all descriptors. The remaining eight compounds are outliers from other descriptors pairs in the dataset as illustrated in Figure 3 and 4.

Using Panda library in Python, these SMILES records were located and dropped. The list of the dropped SMILES is show below:

- Cc1cc(nnc1NCCN1CCOCC1)=C1C=CC(=O)C=C1
- O=C1C=CC=C\C1=c1\nncol
- CCCC1(C)COB(OC1)C1=CC=C(C)C=C1
- [Kr]
- [Ne]
- [Ar]
- [Xe]
- [Rn]

### 1.4 Descriptors calculation

The final number of attributes (descriptors) in our dataset is 6394 as shown in Table S1.

### 1.5 Validation measures

Four main accuracy measures are used across BBB permeability studies and QSAR research in general, namely: Accuracy, Specificity, Sensitivity and Mathew Correlation Coefficient (MCC).

$$Accuracy = \frac{TP + TN}{TP + TN + FP + FN} \quad (8)$$

$$Specificity = \frac{TN}{TN + FP} \quad (9)$$

$$Sensitivity = \frac{TP}{TP + FN} \quad (10)$$

$$MCC = \frac{(TP \times TN) - (FP \times FN)}{\sqrt{(FP + TN)(FP + TP)(FN + TN)(FN + TP)}} \quad (11)$$

29

30

31

32

33

34

Where TP is true positive of the number of compounds correctly classified as "positive" or BBB+; TN is true negative of compounds correctly classified as BBB- by the classifier; FP is false positive which indicate number of compounds mistakenly classified as BBB+; and FN is false negative which is number of compounds that penetrate BBB but mistakenly classified as BBB-.

35 **1.5.1 Results of Baseline FFDNN Model**

36 Prior to scaling the network or applying a resampling technique, we experimentally tested all the combi-  
37 nations of hyper-parameter tuning. The initial results of the different activation functions on the FFDNN  
38 model is presented in Table S3. The final hyperparameters set is shown in Table S3.

39 Table S4 demonstrates the effect of the right regularizing and tuning of the model in the overall  
40 performance.

41 **2 DATASET**

42 A downloadable link to the dataset can be obtained from (Git): [https://github.com/S-A-A-BBB/BBB-](https://github.com/S-A-A-BBB/BBB-Prediction.git)  
43 [Prediction.git](https://github.com/S-A-A-BBB/BBB-Prediction.git).

44 **REFERENCES**

45 [noal] Alvascience Srl, alvaDesc (software for molecular descriptors calculation, visited: 2019-10-16 ).

46 [Git] Github, september 2020 <https://github.com/s-a-a-bbb/bbb-prediction.git>.

47 [3] Sushko, I., Novotarskyi, S., Körner, R., Pandey, A. K., Rupp, M., Teetz, W., Brandmaier, S., Abdelaziz,  
48 A., Prokopenko, V. V., Tanchuk, V. Y., et al. (2011). Online chemical modeling environment (ochem):  
49 web platform for data storage, model development and publishing of chemical information. J. Comput.  
50 Aided Mol., 25(6):533–554.

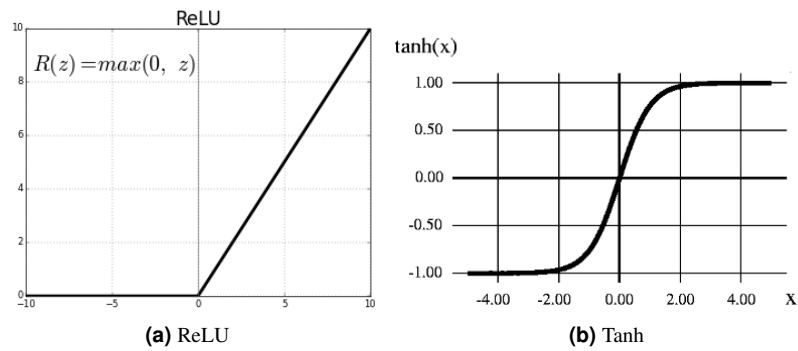

Figure S2: ReLU and Tanh

Table S2: Model hyper-parameter

| hyper-parameter               | Value                           |
|-------------------------------|---------------------------------|
| Number of hidden layers       | 3                               |
| Number of hidden layers nodes | 256,128,64                      |
| Activation function           | Input layer: ReLU<br>Tanh       |
| Batch size                    | 200                             |
| Number of epochs              | 100                             |
| Optimizer                     | Adam                            |
| Regularization                | 2 layers of Batch Normalization |
| Scaler                        | MinMax scaler                   |
| Learning rate                 | 0.01                            |
| Validation                    | 10 fold cross validation        |
| Loss                          | Binary crossentropy             |
| Resampling technique          | SMOTE                           |
| Feature extraction            | Kernel PCA                      |

Table S3: FFDNN with with different Activation Functions

(Act. Function= Activation Function, Sens= Sensitivity scores, Spec= Specificity scores, ACC= Overall accuracy, MCC= Matheow correlation coefficient, AUC= Area under the curves).

| Activation Function | Training set |       |       | Test set |       |       |       |       |
|---------------------|--------------|-------|-------|----------|-------|-------|-------|-------|
|                     | Acc          | Sens. | Spec. | Acc      | Sens. | Spec. | ROC   | MCC   |
| ReLU                | 76.96        | 100.0 | 0.0   | 75.74    | 100.0 | 0.0   | 50.0  | 0     |
| Tanh                | 83.45        | 95.39 | 45.19 | 86.17    | 95.94 | 50.0  | 81.50 | 54.47 |
| LeakyRelu           | 76.59        | 100.0 | 0.0   | 77.23    | 100.0 | 0.0   | 50.0  | 0.0   |
| Tanh+ ReLU          | 82.18        | 92.96 | 47.29 | 80.63    | 91.28 | 42.71 | 76.20 | 38.20 |

Table S4: FFDNN with different Optimizers

| Model (optimizer) | Training set |       |       | Test set |        |       |       |       |
|-------------------|--------------|-------|-------|----------|--------|-------|-------|-------|
|                   | ACC          | Sens. | Spec. | ACC      | Sens.  | Spec. | ROC   | MCC   |
| Tanh + Adam       | 99.78        | 99.79 | 99.77 | 91.21    | 94.69  | 80.35 | 94.46 | 75.75 |
| Tanh + SGD        | 80.79        | 81.70 | 77.69 | 77.65    | 77.936 | 76.85 | 86.41 | 49.8  |
| ReLU+ Tanh + Adam | 99.78        | 99.93 | 99.33 | 91.06    | 93.04  | 83.35 | 92.00 | 73.68 |
| ReLU+ Tanh + SGD  | 82.92        | 82.51 | 84.30 | 75.95    | 77.71  | 70.85 | 81.92 | 44.47 |

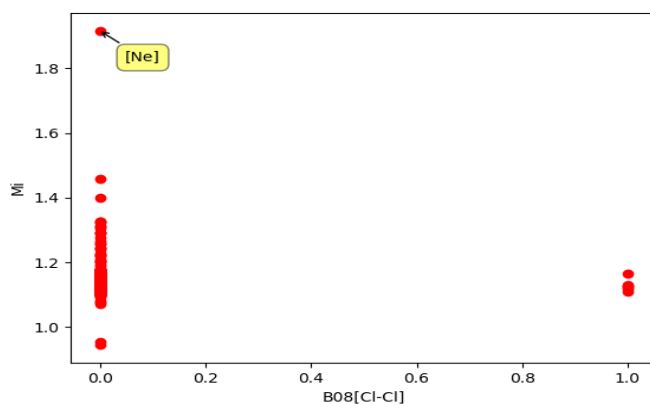

Figure S3: Outier 1

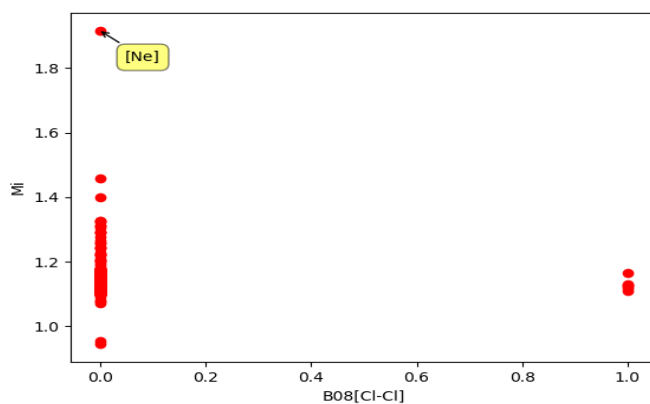

Figure S4: Outier 2

Table S5: FFDNN with SMOTE

| Act. Func. | SMOTE Num of K | Training set |       |       | Test set |       |       |       |       |
|------------|----------------|--------------|-------|-------|----------|-------|-------|-------|-------|
|            |                | ACC          | Sens. | Spec. | ACC      | Sens. | Spec. | ROC   | MCC   |
| Tanh       | 9              | 99.86        | 99.82 | 99.97 | 95.86    | 93.26 | 98.42 | 98.65 | 91.85 |
|            | 12             | 99.86        | 99.78 | 99.94 | 96.25    | 93.84 | 98.66 | 98.53 | 92.62 |
| ReLU+ Tanh | 9              | 99.86        | 99.88 | 99.77 | 96.17    | 93.72 | 98.61 | 98.61 | 92.46 |
|            | 12             | 99.89        | 99.79 | 100   | 96.20    | 93.51 | 98.89 | 98.73 | 92.54 |

Table S6: Performance comparison of K-fold validation vs. fixed split

(ACC= Overall accuracy, Sens= Sensitivity scores, Spec= Specificity scores, MCC= Matheow correlation coefficient, AUC= Area under the curves, ACC-Ext= Overall accuracy on external dataset, Valid= Validation method).

| Model | Training set |     |       |       | Test set |       |       |       |       |              |         |
|-------|--------------|-----|-------|-------|----------|-------|-------|-------|-------|--------------|---------|
|       | Valid.       | ACC | Sens. | Spec. | ACC      | Sens. | Spec. | AUC   | MCC   | CI(95%)      | ACC-Ext |
| FFDNN | 10-fold      | 100 | 96.78 | 98.11 | 97.11    | 97.35 | 98.42 | 97.7  | 95.55 | .020 - .072  | 0.965   |
| FFDNN | 80/20        | 100 | 95.76 | 97.77 | 96.95    | 94.76 | 98.94 | 98.6  | 93.95 | 0.21 - 0.074 | 0.965   |
| CNN   | 10-fold      | 100 | 98.76 | 99.87 | 97.76    | 94.50 | 98.31 | 98.00 | 92.85 | .043 - .097  | 0.97    |
| CNN   | 80-20        | 100 | 94.72 | 98.65 | 96.78    | 96.14 | 97.39 | 98.9  | 93.57 | 0.39 - 0.92  | 0.97    |
